# Supplementary material
Source: PubMed Central journal article supplement (PMC4267351)
Supplement: pnas.201418317SI.pdf [file pnas.201418317SI.pdf]

# Supporting Information

Sylak-Glassman et al. 10.1073/pnas.1418317111

## SI Text

### SI NPQ Calculation

NPQ is calculated using  $F_m$ , the fluorescence yield in the dark, and  $F'_m$ , the fluorescence yield after exposure to light:

$$NPQ = \frac{F_m - F'_m}{F'_m}. \quad [S1]$$

The fluorescence yield,  $F$ , is proportional to the integral of the time-resolved fluorescence,  $F(t)$ :

$$F \propto \int_0^{\infty} F(t) dt. \quad [S2]$$

Using the above definition for the fluorescence yield, and the definition for the average fluorescence lifetime (Eq. 2 in the main text), the amount of NPQ can be rewritten as follows:

$$NPQ = \frac{\tau_{avg, dark} - \tau_{avg, light}}{\tau_{avg, light}}. \quad [S3]$$





**Table S1. Pigment analysis of wild type and *npq4***

| Genotype    | Light condition | Violaxanthin content,<br>mmol per mol chl a | Antheraxanthin content,<br>mmol per mol chl a | Zeaxanthin content,<br>mmol per mol chl a |
|-------------|-----------------|---------------------------------------------|-----------------------------------------------|-------------------------------------------|
| Wild type   | Dark-adapted    | 48                                          | 0.8                                           | 0                                         |
|             | 30 s of light   | 51                                          | 9.5                                           | 0                                         |
|             | 30 min of light | 20                                          | 9.1                                           | 21                                        |
| <i>npq4</i> | Dark-adapted    | 54                                          | 2.7                                           | 0                                         |
|             | 30 s of light   | 43                                          | 7.6                                           | 0                                         |
|             | 30 min of light | 20                                          | 13                                            | 21                                        |

Dark-adapted measurements are an average of two samples. Light-adapted measurements are from one sample.
